# Supplementary material for: Anisotropic Gold Nanoparticle-Cell Interactions Mediated by Collagen
Source: PubMed Central journal article supplement (PMC6480049; doi:10.3390/ma12071131), 2019-04-06
Supplement: materials-12-01131-s001.pdf [file materials-12-01131-s001.pdf]

Supplementary Information

# Anisotropic Gold Nanoparticle-Cell Interactions Mediated by Collagen

Oana T. Marișca <sup>1</sup> and Nicolae Leopold <sup>1,2,\*</sup>

<sup>1</sup> Faculty of Physics, Babeș-Bolyai University, 400084 Cluj-Napoca, Romania; oanamarisca@gmail.com

<sup>2</sup> IMOGEN Research Institute, County Clinical Emergency Hospital, 400012 Cluj-Napoca, Romania

\* Correspondence: nicolae.leopold@phys.ubbcluj.ro; Tel.: +40-264-405300

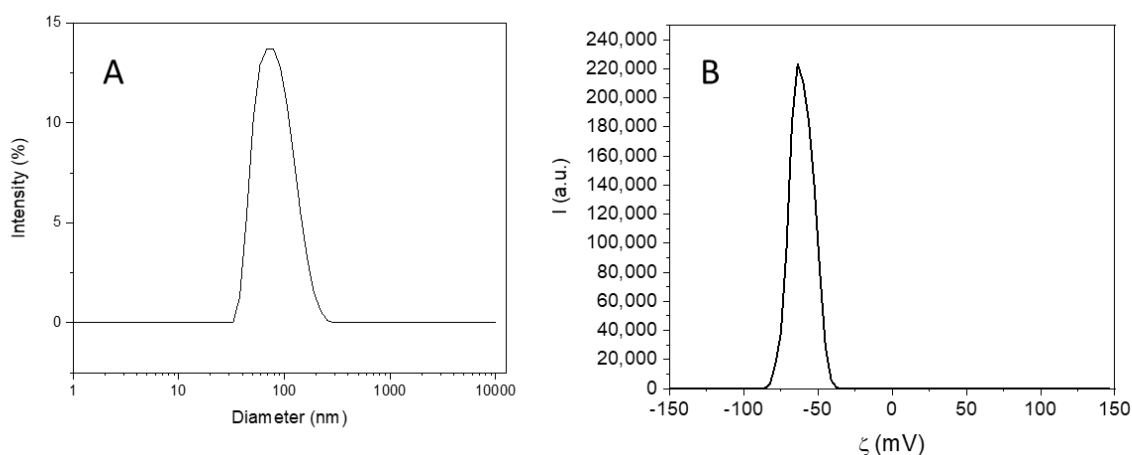

**Figure S1.** Size distribution of clg-AuNPs measured by dynamic light scattering (DLS) (A). Zeta potential distribution of clg-AuNPs (B).

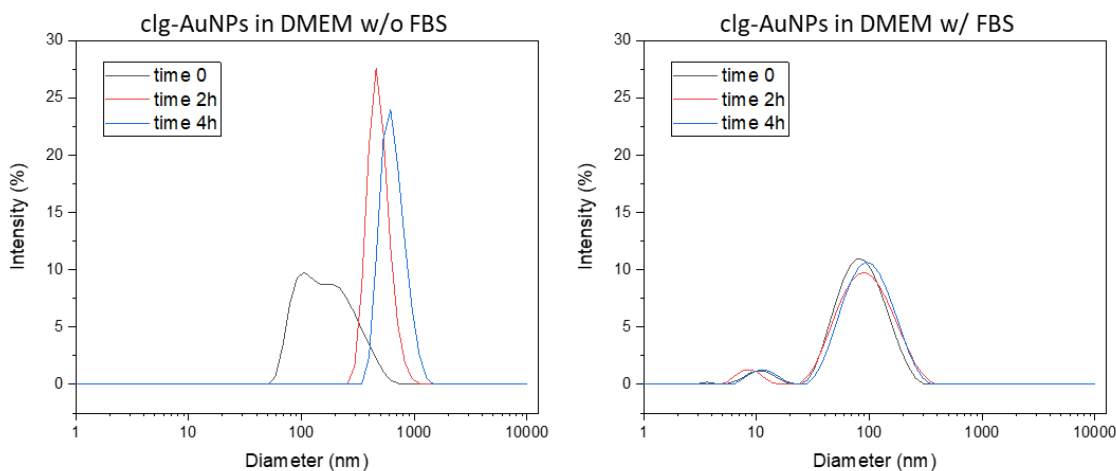

**Figure S2.** DLS measurements showing clg-AuNPs stability in cell culture medium without or with serum.

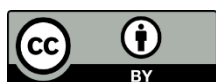

© 2019 by the authors. Licensee MDPI, Basel, Switzerland. This article is an open access article distributed under the terms and conditions of the Creative Commons Attribution (CC BY) license (<http://creativecommons.org/licenses/by/4.0/>).
